# Supplementary material for: mRNA decapping is an evolutionarily conserved modulator of neuroendocrine signaling that controls development and ageing
Source: eLife. 2020 May 5;9:e53757. doi: 10.7554/eLife.53757 (PMC7200159; doi:10.7554/eLife.53757)
Supplement: Figure 1—source data 1. [file elife-53757-fig1-data1.xlsx]

## Sheet: Sheet1
Lifespan of dcap-1(tm3163) worms that overexpress a dcap-1::gfp fusion tissue-specifically at 20°C.
	Strain	Genotype	Tissue of dcap-1 overexpression	Median/Max lifespan	Mean1 ± SEM	N2 (T/C)	p-value vs dcap-1
1◊	BRF345◊	synEx31[rol-6(s1006)] (wt)	-	20/36	21.33±1.67	106/23	<0.0001(****)
	BRF354◊	dcap-1(tm3163);synEx31[rol-6(s1006)]	-	14/24	14.33±1.86	103/40	-
	BRF250◊	dcap-1(tm3163);synEx293[unc-119p::dcap-1::gfp,rol-6(s1006)]	Neurons	20/33	21.00±1.53	95/28	<0.0001(****)
2	BRF345	synEx31[rol-6(s1006)] (wt)	-	23/36	23.33±1.20	108/23	<0.0001(****)
	BRF354	dcap-1(tm3163);synEx31[rol-6(s1006)]	-	16/31	15.33±0.88	120/32	-
	BRF250	dcap-1(tm3163);synEx293[unc-119p::dcap-1::gfp,rol-6(s1006)]	Neurons	23/35	22.67±0.88	118/28	<0.0001(****)
3	BRF345	synEx31[rol-6(s1006)] (wt)	-	22/38	21.50±0.50	67/4	<0.0001(****)
	BRF354	dcap-1(tm3163);synEx31[rol-6(s1006)]	-	13/21	13.33±0.33	104/30	-
	BRF250	dcap-1(tm3163);synEx293[unc-119p::dcap-1::gfp,rol-6(s1006)]	Neurons	23/38	22.67±2.60	92/18	<0.0001(****)
	BRF356	dcap-1(tm3163);synEx326[hlh-1p::dcap-1::gfp,rol-6(s1006)]	Muscles	17/31	17.00±1.00	96/18	<0.0001(****)
4◊	BRF345◊	synEx31[rol-6(s1006)] (wt)	-	21/32	21.50±0.71	66/17	<0.0001(****)
	BRF354◊	dcap-1(tm3163);synEx31[rol-6(s1006)]	-	14/21	14.50±0.50	67/13	-
	BRF410	dcap-1(tm3163);synEx345[rab-3p::dcap-1::gfp,rol-6(s1006)]	Neurons	20/33	20.50±0.50	65/2	<0.0001(****)
	BRF411◊	dcap-1(tm3163);synEx328[ges-1p::dcap-1::gfp,rol-6(s1006)]	Intestine	18/29	17.50±0.71	67/12	<0.0001(****)
	BRF356	dcap-1(tm3163);synEx326[hlh-1p::dcap-1::gfp,rol-6(s1006)]	Muscles	21/32	21.00±1.00	66/9	<0.0001(****)
5◊	BRF345◊	synEx31[rol-6(s1006)] (wt)	-	21/34	21.50±1.50	70/16	<0.0001(****)
	BRF354◊	dcap-1(tm3163);synEx31[rol-6(s1006)]	-	14/19	14.00±0.00	87/29	-
	BRF410	dcap-1(tm3163);synEx345[rab-3p::dcap-1::gfp,rol-6(s1006)]	Neurons	18/33	17.50±1.26	98/19	<0.0001(****)
	BRF411	dcap-1(tm3163);synEx328[ges-1p::dcap-1::gfp,rol-6(s1006)]	Intestine	15/26	16.00±1.53	100/20	0.0001(***)
	BRF356◊	dcap-1(tm3163);synEx326[hlh-1p::dcap-1::gfp,rol-6(s1006)]	Muscles	19/30	18.33±1.20	101/23	<0.0001(****)
6	BRF345	synEx31[rol-6(s1006)] (wt)	-	17/31	17.00±1.53	103/12	<0.0001(****)
	BRF354	dcap-1(tm3163);synEx31[rol-6(s1006)]	-	15/21	15.00±0.58	105/17	-
	BRF250	dcap-1(tm3163);synEx293[unc-119p::dcap-1::gfp,rol-6(s1006)]	Neurons	18/31	17.50±1.76	105/8	<0.0001(****)
	BRF410	dcap-1(tm3163);synEx345[rab-3p::dcap-1::gfp,rol-6(s1006)]	Neurons	19/31	19.00±1.16	106/9	<0.0001(***)
7	BRF345	synEx31[rol-6(s1006)] (wt)	-	21/34	21.00±1.16	106/17	<0.0001(****)
	BRF354	dcap-1(tm3163);synEx31[rol-6(s1006)]	-	14/20	14.00±0.58	113/30	-
	BRF250	dcap-1(tm3163);synEx293[unc-119p::dcap-1::gfp,rol-6(s1006)]	Neurons	23/39	23.67±0.33	110/14	<0.0001(****)
	BRF410	dcap-1(tm3163);synEx345[rab-3p::dcap-1::gfp,rol-6(s1006)]	Neurons	23/36	23.33±0.89	111/18	<0.0001(****)
8◊	BRF345◊	synEx31[rol-6(s1006)] (wt)	-	21/34	21.33±0.88	104/20	<0.0001(****)
	BRF354◊	dcap-1(tm3163);synEx31[rol-6(s1006)]	-	13/19	12.67±0.33	95/22	-
	BRF478◊	dcap-1(tm3163);synEx364[col-10p::dcap-1::gfp,rol-6(s1006)]	Epidermis	19/30	19.00±0.58	88/22	<0.0001(****)
9	BRF345	synEx31[rol-6(s1006)] (wt)	-	22/34	23.00±1.00	107/27	<0.0001(****)
	BRF354	dcap-1(tm3163);synEx31[rol-6(s1006)]	-	11/21	12.00±0.58	102/37	-
	BRF478	dcap-1(tm3163);synEx364[col-10p::dcap-1::gfp,rol-6(s1006)]	Epidermis	20/31	19.50±0.50	74/40	<0.0001(****)
1Refers to the average median lifespan of replicate plates within each experiment
2T = total / C = censored
◊marks data shown in Figure 1
