# Supplementary material for: mRNA decapping is an evolutionarily conserved modulator of neuroendocrine signaling that controls development and ageing
Source: eLife. 2020 May 5;9:e53757. doi: 10.7554/eLife.53757 (PMC7200159; doi:10.7554/eLife.53757)
Supplement: Figure 1—source data 2. [file elife-53757-fig1-data2.xlsx]

## Sheet: Sheet1
Lifespan of dcap-1(tm3163) worms that overexpress a dcap-1::gfp fusion tissue-specifically at 25°C.
	Strain	Genotype	Tissue of dcap-1 overexpression	Median/Max lifespan	Mean1 ± SEM	N2 (T/C)	p-value vs dcap-1	p-value vs wt
1	BRF345	synEx31[rol-6(s1006)] (wt)	-	8/19	8,33±0,33	102/3	0.0065(**)	-
	BRF354	dcap-1(tm3163);synEx31[rol-6(s1006)]	-	7/14	7,00±0,58	88/36	-	0,0065(**)
	BRF250	dcap-1(tm3163);synEx293[unc-119p::dcap-1::gfp,rol-6(s1006)]	Neurons	8/19	8,00±0,00	93/5	0.0020(**)	0,8285(ns)
	BRF356	dcap-1(tm3163);synEx326[hlh-1p::dcap-1::gfp,rol-6(s1006)]	Muscles	7/15	7.33±0.33	99/37	0.6885(ns)	0.0139(*)
2◊	BRF345◊	synEx31[rol-6(s1006)] (wt)	-	10/19	9.97±0.33	108/7	<0.0001(****)	-
	BRF354◊	dcap-1(tm3163);synEx31[rol-6(s1006)]	-	8/11	8.00±0.00	62/23	-	<0.0001(****)
	BRF250◊	dcap-1(tm3163);synEx293[unc-119p::dcap-1::gfp,rol-6(s1006)]	Neurons	9/21	9.67±0.88	84/7	<0.0001(****)	0.4339(ns)
	BRF410	dcap-1(tm3163);synEx345[rab-3p::dcap-1::gfp,rol-6(s1006)]	Neurons	11/18	11.00±0.00	90/20	<0.0001(****)	0.4382(ns)
	BRF411◊	dcap-1(tm3163);synEx328[ges-1p::dcap-1::gfp,rol-6(s1006)]	Intestine	9/17	8.67±0.67	79/32	0.0038(**)	0.0256(*)
3◊	BRF345◊	synEx31[rol-6(s1006)] (wt)	-	10/20	10.00±0.00	96/4	<0.0001(****)	-
	BRF354◊	dcap-1(tm3163);synEx31[rol-6(s1006)]	-	9/14	8.00±1.00	70/14	-	<0.0001(****)
	BRF250	dcap-1(tm3163);synEx293[unc-119p::dcap-1::gfp,rol-6(s1006)]	Neurons	9.5/19	9.50±0.29	101/3	0.0004(***)	0.1591(ns)
	BRF410	dcap-1(tm3163);synEx345[rab-3p::dcap-1::gfp,rol-6(s1006)]	Neurons	12/18	12.33±0.33	101/12	<0.0001(****)	0.2505(ns)
	BRF411	dcap-1(tm3163);synEx328[ges-1p::dcap-1::gfp,rol-6(s1006)]	Intestine	9/18	10.33±1.33	100/15	0.0010(***)	0.0183(*)
	BRF356◊	dcap-1(tm3163);synEx326[hlh-1p::dcap-1::gfp,rol-6(s1006)]	Muscles	8/17	7.50±0.29	91/9	0.7505(ns)	<0.0001(****)
4	BRF345	synEx31[rol-6(s1006)] (wt)	-	12/16	12.00±0.00	111/2	0.0002(***)	-
	BRF354	dcap-1(tm3163);synEx31[rol-6(s1006)]	-	11/15	11.25±0.63	139/4	-	0.0002(***)
	BRF410	dcap-1(tm3163);synEx345[rab-3p::dcap-1::gfp,rol-6(s1006)]	Neurons	13/16	12.67±0.33	117/2	<0.0001(****)	0.0134(*)
	BRF411	dcap-1(tm3163);synEx328[ges-1p::dcap-1::gfp,rol-6(s1006)]	Intestine	14/17	14.00±0.58	109/5	<0.0001(****)	<0.0001(****)
	BRF356	dcap-1(tm3163);synEx326[hlh-1p::dcap-1::gfp,rol-6(s1006)]	Muscles	11/15	11.67±0.33	98/0	0.2633(ns)	0.0192(*)
5◊	BRF345◊	synEx31[rol-6(s1006)] (wt)	-	11/18	11.00±0.00	56/14	<0.0001(****)	-
	BRF354◊	dcap-1(tm3163);synEx31[rol-6(s1006)]	-	6/10	5.67±0.67	102/43	-	<0.0001(****)
	BRF478◊	dcap-1(tm3163);synEx364[col-10p::dcap-1::gfp,rol-6(s1006)]	Epidermis	6/11	5.33±0.33	86/23	0.3101(ns)	<0.0001(****)
6	BRF345	synEx31[rol-6(s1006)] (wt)	-	13/17	13.17±0.17	108/0	<0.0001(****)	-
	BRF354	dcap-1(tm3163);synEx31[rol-6(s1006)]	-	11/14	10.67±0.67	105/21	-	<0.0001(****)
	BRF356	dcap-1(tm3163);synEx326[hlh-1p::dcap-1::gfp,rol-6(s1006)]	Muscles	12/14	12.00±0.00	107/19	0.0001(***)	<0.0001(****)
	BRF410	dcap-1(tm3163);synEx345[rab-3p::dcap-1::gfp,rol-6(s1006)]	Neurons	12/16	12.50±0.29	104/0	<0.0001(****)	0.0004(***)
	BRF411	dcap-1(tm3163);synEx328[ges-1p::dcap-1::gfp,rol-6(s1006)]	Intestine	12/15	11.33±0.33	95/3	0.0109(*)	<0.0001(****)
	BRF478	dcap-1(tm3163);synEx364[col-10p::dcap-1::gfp,rol-6(s1006)]	Epidermis	10/13	10.33±0.33	93/19	0.6864(ns)	<0.0001(****)
1Refers to the average median lifespan of replicate plates within each experiment
2T = total / C = censored
†Conducted in the presence of 50μM FUdR
◊marks data shown in Figure 1
