# Supplementary material for: mRNA decapping is an evolutionarily conserved modulator of neuroendocrine signaling that controls development and ageing
Source: eLife. 2020 May 5;9:e53757. doi: 10.7554/eLife.53757 (PMC7200159; doi:10.7554/eLife.53757)
Supplement: Figure 2—source data 1. [file elife-53757-fig2-data1.xlsx]

## Sheet: Sheet1
Lifespan of worms that overexpress a dcap-1::gfp fusion tissue-specifically in wild type genetic background at 20°C.
	Strain	Genotype	Tissue of dcap-1 overexpression	Median/Max lifespan	Mean1 ± SEM	N2 (T/C)	p-value vs wt
1	BRF345	synEx31[rol-6(s1006)] (wt)	-	20/29	20.00±0.58	106/20	-
	BRF632	synEx326[hlh-1p::dcap-1::gfp,rol-6(s1006)]	Muscles	18/26	18.67±0.67	107/25	0.0312(*)
2	BRF345	synEx31[rol-6(s1006)] (wt)	-	19/26	19.00±0.91	119/27	-
	BRF588	synEx328[ges-1p::dcap-1::gfp,rol-6(s1006)]	Intestine	20/25	19.88±0.59	81/3	0.3461(ns)
	BRF632	synEx326[hlh-1p::dcap-1::gfp,rol-6(s1006)]	Muscles	19/25	19.00±0.41	102/20	0.8977(ns)
3◊	BRF345◊	synEx31[rol-6(s1006)] (wt)	-	23/33	22.67±0.33	89/10	-
	BRF591◊	synEx364[col-10p::dcap-1::gfp,rol-6(s1006)]	Epidermis	23/36	23.00±1.00	103/17	0.1708(ns)
4◊	BRF345◊	synEx31[rol-6(s1006)] (wt)	-	20/31	20.00±2.64	93/18	-
	BRF582	synEx293[unc-119p::dcap-1::gfp,rol-6(s1006)]	Neurons	22/36	22.00±0.00	98/6	0.0492(*)
	BRF588◊	synEx328[ges-1p::dcap-1::gfp,rol-6(s1006)]	Intestine	23/35	23.50±0.87	93/13	0.0047(**)
	BRF589	synEx345[rab-3p::dcap-1::gfp,rol-6(s1006)]	Neurons	24/36	23.00±1.00	94/8	0.0092(**)
	BRF591	synEx364[col-10p::dcap-1::gfp,rol-6(s1006)]	Epidermis	20/29	20.00±1.16	98/24	0.2561(ns)
5	BRF345	synEx31[rol-6(s1006)] (wt)	-	23/32	22.33±0.67	82/13	-
	BRF589	synEx345[rab-3p::dcap-1::gfp,rol-6(s1006)]	Neurons	24/39	24.33±0.67	99/4	0.0005(***)
	BRF582	synEx293[unc-119p::dcap-1::gfp,rol-6(s1006)]	Neurons	26/36	25.67±0.67	95/4	0.0017(**)
6◊	BRF345◊	synEx31[rol-6(s1006)] (wt)	-	20/29	21.17±1.17	82/19	-
	BRF589	synEx345[rab-3p::dcap-1::gfp,rol-6(s1006)]	Neurons	23/34	23.00±1.00	96/34	0.0024(**)
	BRF582◊	synEx293[unc-119p::dcap-1::gfp,rol-6(s1006)]	Neurons	25/43	24.83±0.60	89/16	<0.0001(****)
	BRF591	synEx364[col-10p::dcap-1::gfp,rol-6(s1006)]	Epidermis	22/32	22.00±1.16	99/21	0.1018(ns)
	BRF588	synEx328[ges-1p::dcap-1::gfp,rol-6(s1006)]	Intestine	22/34	22.33±0.33	81/8	0.0601(ns)
	BRF632◊	synEx326[hlh-1p::dcap-1::gfp,rol-6(s1006)]	Muscles	20/33	20.33±0.88	101/19	0.5589(ns)
1Refers to the average median lifespan of replicate plates within each experiment
2T = total / C = censored
◊marks data shown in Figure 2
