# Supplementary material for: mRNA decapping is an evolutionarily conserved modulator of neuroendocrine signaling that controls development and ageing
Source: eLife. 2020 May 5;9:e53757. doi: 10.7554/eLife.53757 (PMC7200159; doi:10.7554/eLife.53757)
Supplement: Figure 2—source data 2. [file elife-53757-fig2-data2.xlsx]

## Sheet: Sheet1
Lifespan of worms depleted of daf-2 or daf-16 at 20°C.
	Strain	Genotype	Tissue of dcap-1 overexpression	RNAi Treatment (Post-developmental)	Median/Max lifespan	Mean1 ± SEM	N2 (T/C)	p-value vs control strain
1◊	BRF667◊	daf-16(mu86);synEx31[rol-6(s1006)]	-	-	15/21	14.83±0.44	81/0	-
	BRF666◊	dcap-1(tm3163);daf-16(mu86);synEx293[unc-119p::dcap-1::gfp,rol-6(s1006)]	Neurons		14/22	13.67±0.33	69/0	0.6544(ns)
2	BRF667	daf-16(mu86);synEx31[rol-6(s1006)]	-	-	17/22	17.00±0.00	64/0	-
	BRF666	dcap-1(tm3163);daf-16(mu86);synEx293[unc-119p::dcap-1::gfp,rol-6(s1006)]	Neurons		14/23	13.50±0.29	68/0	0.1114(ns)
3†	CF1038	daf-16(mu86)	-	-	18/22	18.33±0.33	113/44	-
	BRF412	dcap-1(tm3163);daf-16(mu86)	-		18/24	18.00±0.00	145/17	0.7990(ns)
4†	CF1038	daf-16(mu86)	-	-	20/23	20.00±0.41	101/33	-
	BRF412	dcap-1(tm3163);daf-16(mu86)	-		20/22	20.25±0.25	103/22	0.4838(ns)
5†	CF1038	daf-16(mu86)	-	-	18/24	18.00±0.00	118/7	-
	BRF412	dcap-1(tm3163);daf-16(mu86)	-		17/23	16.00±0.58	100/8	0.0199(*)
6◊	BRF345◊	synEx31[rol-6(s1006)]	-	Empty vector	20/27	19.67±0.33	119/15	-
				daf-16 RNAi	17/24	17.33±0.67	105/3	-
				daf-2 RNAi◊	35/54	34.83±0.93	104/8	-
	BRF582◊	synEx293[unc-119p::dcap-1::gfp,rol-6(s1006)]	Neurons	Empty vector	26/34	25.75±0.75	81/12	<0.0001(****)
				daf-16 RNAi	18/24	18.33±0.88	112/7	0.5621(ns)
				daf-2 RNAi◊	37/52	36.83±1.59	107/7	0.8907(ns)
7	BRF345	synEx31[rol-6(s1006)]	-	Empty vector	19/26	19.67±1.20	109/45	-
				daf-16 RNAi	17/23	16.33±0.33	116/43	-
				daf-2 RNAi	33/54	34.00±1.52	113/50	-
	BRF582	synEx293[unc-119p::dcap-1::gfp,rol-6(s1006)]	Neurons	Empty vector	25/29	25.00±1.15	100/52	<0.0001(****)
				daf-16 RNAi	19/23	19.00±1.00	107/44	0.0336(*)
				daf-2 RNAi	31/51	31.33±1.20	114/47	04787(ns)
8	BRF345	synEx31[rol-6(s1006)]	-	Empty vector	21/31	21.33±0.88	102/1	-
				daf-16 RNAi	19/25	18.83±0.44	102/4	-
	BRF582	synEx293[unc-119p::dcap-1::gfp,rol-6(s1006)]	Neurons	Empty vector	26/35	26.33±0.33	106/4	<0.0001(****)
				daf-16 RNAi	20/28	20.00±0.58	104/1	0.0031(**)
9◊	BRF345◊	synEx31[rol-6(s1006)]	-	Empty vector	18/27	18.00±0.00	91/3	-
				daf-16 RNAi◊	16/23	15.33±0.67	96/12	-
				daf-2 RNAi	30/50	30.00±4.27	75/4	-
	BRF582◊	synEx293[unc-119p::dcap-1::gfp,rol-6(s1006)]	Neurons	Empty vector	23/35	23.33±0.58	83/17	<0.0001(****)
				daf-16 RNAi◊	18/24	18.00±0.00	103/24	0.0119(*)
				daf-2 RNAi	31/49	30.50±2.47	89/25	0.9433(ns)
1Refers to the average median lifespan of replicate plates within each experiment
2T = total / C = censored
Experiments 1-5 were conducted in OP50 and 6-12 in HT115(DE3) E. coli bacteria
†Conducted in the presence of 50μM FUdR
◊marks data shown in Figure 2
