# Supplementary material for: mRNA decapping is an evolutionarily conserved modulator of neuroendocrine signaling that controls development and ageing
Source: eLife. 2020 May 5;9:e53757. doi: 10.7554/eLife.53757 (PMC7200159; doi:10.7554/eLife.53757)
Supplement: Figure 2—source data 3. [file elife-53757-fig2-data3.xlsx]

## Sheet: Sheet1
Lifespan of dcap-2(ok2023) worms that overexpress a dcap-1::gfp fusion tissue-specifically at 20°C.
	Strain	Genotype	Tissue of dcap-1 overexpression	Median/Max lifespan	Mean1 ± SEM	N2 (T/C)	p-value vs dcap-2
1	BRF788	dcap-2(ok(2023);synEx31[rol-6(su1006)]	-	14/19	13.67±0.88	118/16	-
	BRF774	dcap-2(ok2023);synEx293[unc-119p::dcap-1::gfp::3’UTRdcap-1;rol-6(su1006)]	Neurons	12/19	12.00±0.58	117/20	0.0601(ns)
	BRF775	dcap-2(ok2023);synEx328[ges-1p::dcap-1::gfp::3’UTRdcap-1;rol-6(su1006)]	Intestine	12/18	12.33±0.67	117/14	0.0257(*)
2◊	BRF788◊	dcap-2(ok(2023);synEx31[rol-6(su1006)]	-	13/18	13.67±0.88	120/6	-
	BRF774◊	dcap-2(ok2023);synEx293[unc-119p::dcap-1::gfp::3’UTRdcap-1;rol-6(su1006)]	Neurons	13/18	13.00±1.00	120/10	0.7328(ns)
	BRF775◊	dcap-2(ok2023);synEx328[ges-1p::dcap-1::gfp::3’UTRdcap-1;rol-6(su1006)]	Intestine	14/19	13.33±0.67	118/8	0.2611(ns)
3	BRF788	dcap-2(ok(2023);synEx31[rol-6(su1006)]	-	14/18	14.00±0.58	118/14	-
	BRF774	dcap-2(ok2023);synEx293[unc-119p::dcap-1::gfp::3’UTRdcap-1;rol-6(su1006)]	Neurons	14/21	14.33±0.33	119/15	0.8879(ns)
	BRF775	dcap-2(ok2023);synEx328[ges-1p::dcap-1::gfp::3’UTRdcap-1;rol-6(su1006)]	Intestine	14/18	13.67±0.33	114/14	0.2239(ns)
1Refers to the average median lifespan of replicate plates within each experiment
2T = total / C = censored
All experiments were conducted in the presence of 50μM FUdR
◊marks data shown in Figure 2
