# Supplementary material for: mRNA decapping is an evolutionarily conserved modulator of neuroendocrine signaling that controls development and ageing
Source: eLife. 2020 May 5;9:e53757. doi: 10.7554/eLife.53757 (PMC7200159; doi:10.7554/eLife.53757)
Supplement: Figure 3—source data 1. [file elife-53757-fig3-data1.xlsx]

## Sheet: Sheet1
Lifespan of worms exposed to ins-7 RNAi at 20°C.
	Strain	Genotype	Tissue of dcap-1 overexpression	RNAi Treatment (Post-developmental)	Median/Max lifespan	Mean1 ± SEM	N2 (T/C)	p-value vs control strain
1◊	BRF540◊	uIs60[unc-119p::yfg; unc-119p::sid-1];synEx31[rol-6(s1006)]	-	Empty vector◊	21/32	20.50±2.5	50/5	-
				ins-7 RNAi◊	24/35	25.50±1.50	55/1	0.0054(**)
	BRF499◊	uIs60[unc-119p::yfg; unc-119p::sid-1];synEx293[unc-119p::dcap-1::gfp,rol-6(s1006)]	Neurons	Empty vector◊	26/36	26.25±0.25	54/1	-
				ins-7 RNAi◊	27/36	27.00±0.00	57/2	0.9283(ns)
2	BRF540	uIs60[unc-119p::yfg; unc-119p::sid-1];synEx31[rol-6(s1006)]	-	Empty vector	19/27	19.5±0.50	31/4	-
				ins-7 RNAi	23/28	23.00±1.00	79/4	0.0045(**)
	BRF499	uIs60[unc-119p::yfg; unc-119p::sid-1];synEx293[unc-119p::dcap-1::gfp,rol-6(s1006)]	Neurons	Empty vector	24/30	23.67±0.58	73/2	-
				ins-7 RNAi	25/31	25.00±1.00	80/5	0.0677(ns)
3	BRF540	uIs60[unc-119p::yfg; unc-119p::sid-1];synEx31[rol-6(s1006)]	-	Empty vector	15/22	15.33±0.33	74/6	-
				ins-7 RNAi	19/27	18.50±0.50	46/2	<0.0001(****)
	BRF499	uIs60[unc-119p::yfg; unc-119p::sid-1];synEx293[unc-119p::dcap-1::gfp,rol-6(s1006)]	Neurons	Empty vector	20/27	19.33±0.67	63/0	-
				ins-7 RNAi	18/30	18.33±0.67	87/8	0.9734(ns)
1Refers to the average median lifespan of replicate plates within each experiment
2T = total / C = censored
Experiments were conducted in HT115(DE3) E. coli bacteria
†Conducted in the presence of 50μM FUdR
◊marks data shown in Figure 3
