# Supplementary material for: mRNA decapping is an evolutionarily conserved modulator of neuroendocrine signaling that controls development and ageing
Source: eLife. 2020 May 5;9:e53757. doi: 10.7554/eLife.53757 (PMC7200159; doi:10.7554/eLife.53757)
Supplement: Figure 3—source data 2. — Numeric values of relative mRNA levels of insulin-like peptides in the indicated genetic backgrounds and ages. [file elife-53757-fig3-data2.xlsx]

## Sheet: 3A
	ins-7						daf-28						ins-33						ins-1						ins-6
	1 day			9 days			1 day			9 days			1 day			9 days			1 day			9 days			1 day			9 days
	wt	dcap-1	synEx293	wt	dcap-1	synEx293	wt	dcap-1	synEx293	wt	dcap-1	synEx293	wt	dcap-1	synEx293	wt	dcap-1	synEx293	wt	dcap-1	synEx293	wt	dcap-1	synEx293	wt	dcap-1	synEx293	wt	dcap-1	synEx293
Relative mRNA levels	0.85714	1.09254	1.30631	8.83178	7.29891	3.18205	0.97473	0.757999	1.36988	0.298723	0.70704	0.422611	0.764988	1.51164	0.913944	0.097334	0.093177	0.0876077	1.43263	1.12992	1.39416	0.738708	0.922069	1.685	1.3321	0.932758	1.70054	0.670398	0.783778	0.48336
	0.97764	1.82473	1.39453	4.67766	9.43277	2.42279	0.560667	0.593042	0.570057	0.273643	0.308857	0.293813	0.817743	0.335505	0.730293	0.229684	0.194267	0.161782	0.880516	0.923354	0.51745	0.433226	0.459606	0.626238	0.867256	1.04682	0.755714	1.3296	0.622982	0.304847
	0.913604	1.66749	1.50924	5.31865	10.5391	3.89236	0.418861	0.776643	0.713498	0.713394	0.391931	0.19999	1.25362	0.243328	1.271	0.159997	0.24251	0.198714	0.562068	0.744205	0.585107	0.517559	0.472518	0.600911	0.800641	1.16707	0.691338	0.387588	0.532971	0.273676
	1.41478	1.08893	1.14498	7.07006	12.89	4.83334	0.922884	0.553337	1.55183	0.259196	0.657745	0.265686	0.705664		0.814495	0.176095	0.176478		1.12478		0.961562	0.654376	0.887203					0.542649	0.507556
	0.507992	0.977989	1.46232	3.35991	2.20268	5.15369	1.78978		1.53101	0.471741	1.33335		1.9205			0.206022	0.349089						0.750838					0.369879	1.08899
	0.638117	2.66315	0.640086	6.95329	17.8692	3.36737	0.953566			0.375771	0.57519		0.537483			0.105178	0.343242												0.613191
	0.317826	0.597336	1.45461	6.14497	5.79385	2.07984	1.37952									0.162385
	2.71599	5.60947		2.77919	7.61796	1.16932										0.795148
	0.861468	0.45209		2.21822	6.7244											0.318678
	1.10005	3.57873		3.97073	34.7612
	0.695386	2.73383		11.0763	22.4543
	1.28086	0.976404		3.14243	17.5015
	0.450126	0.815275		3.18084	15.5458
	1.18248			7.39461	10.4064
	1.02092			3.18084	5.13159
	1.2759			8.51145	17.3806
	0.789712			9.64249	15.5561

## Sheet: 3E
	wt	dcap-1	dcap-1; synEx293	dcap-1; synEx328
Relative mRNA levels	0.495897	1.31099	0.892758	2.23357
	1.58632	1.69427	1.85368	1.48076
	0.840177	1.89298	0.970192	2.07107
	0.95531	2.31524	1.47675
	1.26989	0.375321
	0.603491	3.04479
	1.24891	0.98723
	1.04706	1.29805
	0.473554	1.14579
	0.377969	5.92305
	0.676584	3.82606
	1.88732	2.98213
	0.535447	2.6489
	0.541991	1.77318
	1.25999	0.874386
	0.541991	2.96153
	1.45029	2.65064
	1.64301	3.22044
	1.56479

## Sheet: 3G and figure supplement 6
	ins-7				eft-3
	1 day		9 days		1 day		9 days
	ins-7; synEx478	dcap-1;ins-7; synEx478	ins-7; synEx478	dcap-1;ins-7; synEx478	ins-7; synEx478	dcap-1;ins-7; synEx478	ins-7; synEx478	dcap-1;ins-7; synEx478
mature mRNA/ pre-mRNA ratio	1.371	1.94617	4.13673	7.50969	1.20111	0.668045	3.26056	2.81426
	0.629004	2.75579	3.689	7.30653	0.429957	1.09562	1.19889	2.43702
