# Supplementary material for: mRNA decapping is an evolutionarily conserved modulator of neuroendocrine signaling that controls development and ageing
Source: eLife. 2020 May 5;9:e53757. doi: 10.7554/eLife.53757 (PMC7200159; doi:10.7554/eLife.53757)
Supplement: Figure 3—source data 3. — Numeric values of relative fluorescence intensity of ins-7p::gfp and ges-1p::gfp reporters in the indicated genetic backgrounds. [file elife-53757-fig3-data3.xlsx]

## Sheet: 3B
	Total													Head neurons
	1 day		3 days		6 days		9 days		12 days		15 days			1 day		3 days		6 days		9 days		12 days		15 days
	wwEx66	dcap-1; wwEx66	wwEx66	dcap-1; wwEx66	wwEx66	dcap-1; wwEx66	wwEx66	dcap-1; wwEx66	wwEx66	dcap-1; wwEx66	wwEx66	dcap-1; wwEx66		wwEx66	dcap-1; wwEx66	wwEx66	dcap-1; wwEx66	wwEx66	dcap-1; wwEx66	wwEx66	dcap-1; wwEx66	wwEx66	dcap-1; wwEx66	wwEx66	dcap-1; wwEx66
Relative Fluoresence	0.861935	1.80579	1.86952	3.36494	1.97338	2.81568	1.69397	2.27519	1.6973	1.61144	1.99422	2.08845		0.943233	1.47855	0.965763	0.915321	0.357415	0.820657	0.871902	1.20654	1.19579	0.491122	0.764669	0.659117
	1.09816	1.48261	0.966245	2.4384	3.82201	3.09808	3.14017	3.00884	2.94925	2.10109	1.67518	1.62088		1.00002	0.999054	0.658293	1.09102	0.430797	0.841647	0.669192	0.675832	0.808496	0.691589	0.37231	1.0602
	0.511017	1.62162	1.51621	2.09594	2.31301	6.03419	2.04686	5.4158	1.47936	5.36045	1.94533	1.58745		1.12519	1.12496	1.1644	1.60635	0.435042	0.952263	0.555391	0.890062	0.872353	0.945071	0.606935	0.632984
	0.992755	1.8734	1.60184	2.69278	1.48419	3.78556	2.33835	2.01751	0.759232	3.0294	2.79395	3.91539		1.18067	1.33888	0.739797	1.1968	0.367773	0.753936	0.516459	1.57886	0.511406	0.695665	0.467646	0.527466
	0.677097	1.04764	0.945599	2.85433	1.77514	3.91324	2.41466	1.9948	3.09959	1.6067	1.47392	1.51255		1.07071	0.871823	0.870874	1.53332	0.323486	0.637578	0.592392	1.24983	0.820184	0.584296	0.635588	0.760941
	1.00037	1.57611	2.11321	1.93291	2.8162	9.19004	2.72292	6.59527	1.55621	1.18555	4.5633	3.1701		1.20206	0.994529	0.97597	0.894958	0.70504	0.661079	0.436951	0.902061	0.491004	0.934851	0.650048	0.77679
	1.11519	1.74144	1.19292	1.74664	2.49121	7.73945	2.34936	4.56733	1.32403	1.6184	1.02459	5.58863		0.920906	1.05702	0.906744	1.05968	0.910525	0.621711	0.364054	0.911605	0.620375	0.662032	0.469935	0.879217
	1.30421	2.00238	1.41395	3.6296	2.16806	7.30311	1.85915	3.44131	0.963719	2.4953	0.743825	2.18557		0.935254	0.867586	0.95274	0.754858	0.810556	0.579773	0.749238	0.634501	0.832315	0.788566	1.04013	1.16442
	1.46377	1.46676	1.62209	1.18806	2.06142	2.90079	1.27432	2.28559	2.01484	2.66781	3.09486	7.92162		0.917955	1.73777	0.6944	1.45672	0.549888	0.639584	0.69054	0.721745	0.673505	0.700446	0.794404	0.657268
	0.779771	1.66936	1.22845	1.89007	2.69756	1.64879	1.64697	6.36184	1.49694	5.73943	4.23786	5.21756		1.02996	1.35477	0.455224	1.50003	0.561308	0.688001	0.732527	0.502201	0.715054	0.733288	0.473985	0.865193
	1.22776	1.32088	1.19561	2.40348	2.17245	3.25853	0.939335	3.74822	0.930556	8.03015	1.63956	1.8629		0.858397	0.875615	0.558148	0.917444	0.600931	0.689682	0.872925	0.803103	0.449747	0.762669		0.847079
	1.03903	1.25504	1.31585	2.171	2.41088	7.72573	2.60518	2.44424	0.83101	3.71266	2.60842	2.52679		1.09694	0.783929	0.738099	1.09313	0.535413	0.820042	0.662749	0.522199	0.487557	0.708381		0.726648
	0.949175	1.26102	1.18096	1.93088	2.01474	4.19004	1.79673	2.25296	1.11535	5.16714	1.08285	9.58791		1.01189	0.78285	1.18432		0.666373	0.898086	0.772858	0.469984	0.589575	1.19316		1.06294
	0.82561	2.26281	2.4156	2.20325	3.34264	4.30624	2.03084	8.43846	1.03879	8.47162	1.41479	2.02027		1.21981	1.1572	0.966257		0.730805			0.612085	0.477317			0.712907
	0.903382	1.39706	1.4986	2.62001	1.89697	4.19296	2.91905	7.62715	1.63261	1.81771	1.32703	6.18254		0.587567	1.2097	0.729124					1.60687	0.55185			1.22114
	0.668934	1.57526	0.839864	1.71638		6.37864	1.82401	2.2014	1.2817	3.33105	4.77599	4.8937		0.94066	1.0282	0.70787					0.658287				0.7148
	1.55888	1.92339	0.906853	1.68307		4.74618	1.87759	2.21905	1.30129	1.98874	1.74615	1.85298		0.875642		0.782259					0.491762
	0.592205	1.417	1.10564				1.37946	1.66038	4.10979	1.6338		2.58929		0.895382		0.825412
	1.21021	1.77538	1.20174				2.57522	1.37974	0.855883	2.40118				1.10689
	0.873071	2.74737	1.06027				1.72097	1.36014		4.92543				0.943437
	1.06733	1.44751	1.17429					1.39019						1.13744
	1.17326	2.19833	1.14215					1.69628
	1.00751		1.33346					3.1059
	1.09935		1.71328					6.80687
			1.48868					1.30516

## Sheet: 3C
	1 day		3 days		6 days		9 days		11 days
	unc-31; wwEx66	unc-31;dcap-1; wwEx66	unc-31; wwEx66	unc-31;dcap-1; wwEx66	unc-31; wwEx66	unc-31;dcap-1; wwEx66	unc-31; wwEx66	unc-31;dcap-1; wwEx66	unc-31; wwEx66	unc-31;dcap-1; wwEx66
Relative Fluoresence	0.693	0.881	4.764	3.113	4.047	4.381	2.863	2.977	0.438	2.303
	0.903	0.989	2.746	3.389	5.774	2.769	5.969	4.686	3.526	1.508
	1.199	0.961	4.022	3.26	4.274	5.679	4.38	4.186	0.677	5.199
	0.621	0.882	5.153	3.34	3.088	4.84	3.469	6.499	2.755	1.392
	0.635	1.21	4.186	1.961	5.269	3.1	4.645	3.666	2.08	2.043
	0.838	0.56	6.658	3.181	4.763	3.111	4.18	5.873	1.064	0.794
	1.12	1.385	2.633	2.268	5.327	3.902	4.364	8.057	3.163	7.818
	2.182	0.968	1.26	1.967	8.238	7.392	2.699	3.294	4.655	7.239
	0.948	1.168	1.864	1.367	4.064	3.898	2.048	6.1	3.292	2.283
	1.019	1.365	3.142	3.087	3.089	5.793	3.606	5.229	9.546	6.747
	1.094	1.368	1.273	2.037	2.76	5.514	5.805	7.334	2.669	0.652
	0.853	1.248	5.645	3.534	4.821	4.837	4.424	2.665	1.849	2.372
	0.921	0.891	3.274	4.784	1.494	6.906	5.998	2.4	2.979	1.851
	0.974	0.445	2.456	4.122	4.979	4.492	3.482	7.209	3.681	1.388
		1.401	3.773	3.41	1.994	6.976		4.684	2.548	3.483
			1.951	1.984	5.28	6.368		9.754	6.392	8.185
			3.254	2.32	3.599	5.452		2.339	3.492	1.106
			3.828	3.084		4.16
			5.85	3.169		4.136
			4.022	3.401
				2.605
				2.222
				4.166

## Sheet: 3D
	1 day		3 days		6 days		9 days		11 days
	unc-13; wwEx66	unc-13;dcap-1; wwEx66	unc-13; wwEx66	unc-13;dcap-1; wwEx66	unc-13; wwEx66	unc-13;dcap-1; wwEx66	unc-13; wwEx66	unc-13;dcap-1; wwEx66	unc-13; wwEx66	unc-13;dcap-1; wwEx66
Relative Fluoresence	0.809	1.654	1.398	1.099	1.418	1.928	1.461	1.605	1.401	3.895
	1.35	1.79	1.176	1.259	1.116	1.413	1.407	2.03	1.795	1.798
	1.006	1.052	1.082	1.551	1.87	1.747	1.176	2.074	1.595	1.831
	0.802	1.393	1.522	1.177	1.579	1.741	1.751	3.78	1.371	1.519
	0.649	1.164	1.648	1.109	1.756	1.726	2.386	2.301	1.677	1.983
	1.671	0.921	1.245	1.27	0.926	1.782	1.392	2.884	1.361	1.568
	0.715	0.591	1.038	1.275	0.969	2.047	2.662	2.721	2.377	3.32
	0.953	1.069	1.51	1.275	1.44	1.785	1.601	2.407	1.979	1.366
	0.957	1.272	0.963	1.668	1.494	1.505	1.523	3.926	1.538	5.926
	0.747	1.111	1.311	1.059	1.797	1.29	1.301	1.713	2.06	2.473
	0.627	1.011	1.261	1.428	1.788	1.397	2.012	4.828	1.119	5.347
	0.636	1.396	1.091	1.371	1.481	1.414	1.493	3.86	1.078	3.491
	1.021	1.111	0.932	1.607	1.755	2.075	2.191	4.804	1.464	0.545
	0.719	1.329	1.663	1.336	1.873	1.524	1.907	1.756	1.72	3.42
	0.752	1.28	1.591	1.384	1.943	1.515	1.775	2.636	0.99	1.597
	0.704	1.336	1.75	1.107	1.498	2.038	1.065	2.161	1.442	1.576
	1.346	0.974	1.75	1.922	1.283	2.183	1.976	3.941	2.42	2.354
	1.22	1.527	1.193	1.391	1.045	2.166	2.325	2.879	1.282	2.612
	0.999	1.014	1.501	1.504	2.007	1.327	1.675	3.59	1.439	1.862
	0.972	1.552	1.618	1.74	1.493	2.805	1.054	3.66	1.109	1.719
	1.29	1.225	1.096	1.38		1.46	1.677	4.566	1.204	2.979
	0.693	1.516	1.121	2.117		1.631		3.464	1.007
	0.822		1.33	1.65		1.599		2.14	1.578
	1.418		1.335	1.953				2.987	1.585
	1.102		1.478	1.665				2.517	1.792
	1.052		1.556	2.147				2.541	2.672
	1.323		1.393	1.751					1.216
	0.905		1.698	3.598					3.03
	1.743		1.997	2.414					2.105
			1.365	1.797					2.372
				1.779					1.094
				1.704

## Sheet: 3F
	1 day		3 days		6 days		9 days		12 days		15 days
	ins-7; wwEx66	ins-7;dcap-1; wwEx66	ins-7; wwEx66	ins-7;dcap-1; wwEx66	ins-7; wwEx66	ins-7;dcap-1; wwEx66	ins-7; wwEx66	ins-7;dcap-1; wwEx66	ins-7; wwEx66	ins-7;dcap-1; wwEx66	ins-7; wwEx66	ins-7;dcap-1; wwEx66
Relative Fluoresence	0.724603	1.12185	1.9532	5.83772	5.99726	3.12688	3.12371	7.53416	4.51755	1.27937	2.23923	5.82131
	1.35928	1.87633	3.20208	2.20049	3.13001	3.7013	2.73206	6.01207	2.63913	1.15614	1.28409	3.41868
	1.0795	1.28967	3.64816	3.29408	3.21925	6.42432	2.86372	5.22028	4.72105	1.75188	6.08697	4.16114
	1.32605	1.61475	3.30361	2.75145	4.00215	3.46652	2.62108	2.15669	3.14199	1.39883	8.55573	2.3097
	1.32773	1.45283	3.86405	1.54538	5.33067	5.00873	2.32656	5.2091	2.3072	2.15173	2.65458	5.44551
	0.873505	2.10877	1.68887	2.64976	4.02952	3.00841	2.55068	3.6277	5.67341	1.56562	4.24598	4.85626
	0.934077	1.32295	0.923273	3.44681	3.27023	4.72152	3.27258	6.31665	5.67341	4.83868	2.24257	4.00218
	1.13201	1.36032	2.8297	1.6024	3.59385	2.6342	2.67598	4.91966	1.7658	4.95843	5.25866	2.86849
	1.62389	1.42001	4.93619	2.67425	4.1323	4.36888	2.35319	2.2062	2.27264	2.70719	4.09616	3.72685
	1.40972	1.6757	2.78379	2.39652	3.13745	4.90828	2.48567	4.32131	1.96148	1.98647	2.45665	8.36995
	1.26035	1.9332	2.01455	3.45472	4.10867	4.52211	10.4818	3.32955	2.55379	8.55837	2.17655	1.50307
	0.469403	1.08882	5.50827	4.3422	2.14605	3.42718	2.42341	2.28835	3.46454	1.77503	5.23884	3.53334
	1.17513	1.153	4.35594	3.25236	4.23946	4.00074	2.27014	2.42547	5.50053	1.87787	1.33828	1.55818
	0.908436	1.48338	4.40656	3.18059	1.59223	3.98876	3.34313	1.98982	5.12906	1.20707	8.16781	3.31931
	1.08247	1.46325	2.8287	4.07827	3.48234	3.57652	4.79438	5.08249	2.93201	3.79652	1.09615	1.73328
	1.31712	1.13483	2.5519	2.74812	6.55414	3.61906	2.73398	2.49662	6.45528	1.88849	4.3581	2.51217
	1.28251	1.54647	3.60849	2.75874	4.79813	5.82638	2.41979	4.15916	1.47327	2.01697	6.81975	7.88931
	1.33838	1.3576	4.1777	2.52856	3.289	3.50138	2.38101			3.65023	5.75915	2.39488
	0.955902	1.92661	5.10386	1.9683		3.81991	2.78075			2.85043	2.46737	3.6717
	1.53129	1.26326	3.01539	2.35491		2.39794				2.03932		7.10745
	1.56645	1.50698	2.8062	2.32389						1.19475
	1.00753	1.49153	3.05565	3.68026						1.71851
	1.27332		3.99309	2.79156
	0.808087		3.9714	1.92362
			5.4003

## Sheet: figure supplement 2A
	1 day
	synEx176	dcap-1; synEx176
Relative Fluoresence	0.800301	0.776354
	1.27866	0.515251
	0.836452	1.12554
	0.844626	1.04226
	0.83677	0.894616
	1.22675	1.19925
	0.92065	2.11425
	1.0444	0.780943
	1.59781	1.16013
	0.797459	1.12851
	0.743219	1.52976
	1.18789	0.652716
	0.993243	0.892391
	1.30651	1.34403
	0.902776	0.977585
	0.68249	1.23131
		1.11503
		0.582911
		0.623526
		1.08618
