# Supplementary material for: mRNA decapping is an evolutionarily conserved modulator of neuroendocrine signaling that controls development and ageing
Source: eLife. 2020 May 5;9:e53757. doi: 10.7554/eLife.53757 (PMC7200159; doi:10.7554/eLife.53757)
Supplement: Figure 4—source data 1. [file elife-53757-fig4-data1.xlsx]

## Sheet: 4A
	DAF-16a::GFP
	Unstressed		30min		45min
	muIs71	dcap-1; muIs71	muIs71	dcap-1; muIs71	muIs71	dcap-1; muIs71
Nuclei/animal	2	0	5	0	13	0
	1	0	11	0	24	9
	4	0	8	1	24	1
	2	1	11	0	3	2
	2	0	2	3	28	4
	1	0	2	0	16	2
	3	3	1	3	20	3
	2	0	6	4	3	2
	3	0	19	1	11	1
	0	1	2	0	7	1
	1	0	11	1	6	2
	2	0	5	0	22	0
	2	2	8	0	16	1
	1	1	1	2	2	1
	0	1	3	0	23	3
	1	0	7	0	19	1
	1	0	7	0	19	1
	0		36	0	6
	0		4	1	2
			6		4
					4
					17
					24
					5
					15
					14
					22
					21
					7
					3
					8
					1
					19
					2
					1

## Sheet: 4B
	DAF-16a::RFP
	Unstressed		5min		15min
	lpIs12	synEx293; lpIs12	lpIs12	synEx293; lpIs12	lpIs12	synEx293; lpIs12
Nuclei/animal	11	38	16	44	41	15
	17	22	28	51	23	42
	31	20	16	31	40	46
	24	14	19	46	35	50
	22	31	37	56	41	55
	23	42	34	48	44	48
	18	35	16	16	34	51
	32	32	28	28	25	39
	23	50	28	35	37	25
	23	45	30	32	38	37
	16	51	22	44	29	39
	30	36	29	37	49	36
	24	38	30	19	39	30
	15	20	22	29	33	40
	30	32	26	33	19	41
	26	34	32	30	32	38
	27	34	31	12	57	59
	17	27	24	37	24	45
	19	32	28	25	32	54
		37	36	39	36	50
		23	17	48	26	52
		41	37	34	38	40
		19	24	26	42	42
		37	34	39	35
		34		44	42
				31	37
				40	35
