# Supplementary material for: mRNA decapping is an evolutionarily conserved modulator of neuroendocrine signaling that controls development and ageing
Source: eLife. 2020 May 5;9:e53757. doi: 10.7554/eLife.53757 (PMC7200159; doi:10.7554/eLife.53757)
Supplement: Figure 4—source data 2. [file elife-53757-fig4-data2.xlsx]

## Sheet: 4C
	Heat Shock					Oxidative Stress
	wt	dcap-1	dcap-1; synEx293	dcap-1; synEx345		wt	dcap-1	dcap-1; synEx293	dcap-1; synEx345
% Survival after stress	27.5	12.5	25	14.3		67.7	26.2	14	36.9
	40	25	8.3	20.6		55.4	39.7	14	39.1
	31.7	6.7	21.7	8.1		30.8	18.5	28	24.6
	35.9	20	13	14.1		47.7	30.3	19	36
	40	11.4	7.5	3.1		36.9	24.6	42	27.7
	30	7.69	15	8.3		41.2	23.1	33	23.1
	22.5	12.5	12.5	10		56.9	30.2	31	14.5
	45	30		5		63.1		17
	46.2	10.8		5.1		41.7
	16.9	24.6		3.3
	44.1	28.1		1.6
	26.6	21.9
	20	25
	26.3	8.3
	50	6.6
	43.3	3.3
	36.7

## Sheet: 4D
	Heat Shock			Oxidative Stress
	wt	synEx293		wt	synEx293
% Survival after stress	26	18.8		57.9	50
	19.5	30.2		61	55
	23.9	41		56.7	50
	46.9	52		70.28	44.17
	64	55.6		62.71	48.33
	60	48.9		57.63	63.33
	58.3			58.33	48.28
	26.1			58.33
				59.65
				58.33
				37.29
				48.33
				66.67
				70.69
				65
				73.33
				35
				41.67
				51.72
				69.49
				48.33
				66.1
				56.7
				40.7
				46.3
				40
				36.67
				55
				43.33
				50
				33.33
				38.33
				45
				51.67

## Sheet: 4E
	wt								synEx293
day	0	1	2	3	4	5	6	7	0	1	2	3	4	5	6	7
% Survival	100	100	100	96.15	80.77	46.15	15.38	3.85	100	100	100	96.43	92.86	82.14	60.71	21.43
	100	100	96.3	92.6	70.37	22.22	14.81	7.4	100	100	96	96	84	68	56	20
	100	100	100	73.53	79.63	25.92	11.11	0	100	100	100	91.17	95	80	40	15
	100	100	100	70.59	78.43	25.49	5.9	1.96	100	100	100	88.57	90.5	76.2	45.23	9.52
	100	85.7	92	76.19	57.14	23.53	2.9		100	85	97.06	85	75	73.53	29.41
	100	80.95	91.17	71.42	52.38	20.59	2.9		100	90	100	90	90	54.28	20
	100	85.7	80.95	76.19	57.14	14.25			100	95	85	95	90	60
	100		76.19			19.04			100		90			70
	100		85.7			14.28			100		95			65

## Sheet: 4F
	Heat Shock
	wt	synEx293
% Survival after stress	63.8	73.3
	40.7	80
	72.2	83.3
	61.4	88.6
	71.4	80
	71.2	79.7
	60	84
	56.5	73
	71.4	88.2
