# Supplementary material for: mRNA decapping is an evolutionarily conserved modulator of neuroendocrine signaling that controls development and ageing
Source: eLife. 2020 May 5;9:e53757. doi: 10.7554/eLife.53757 (PMC7200159; doi:10.7554/eLife.53757)
Supplement: Figure 5—source data 1. [file elife-53757-fig5-data1.xlsx]

## Sheet: Sheet1
Lifespan of flies with neuronal DCP1 knockdown or overexpression.
	Strain	Description	Conditions	Median/Max lifespan	N	p-value
1◊	BL#458◊	elav:GAL4	Grown and maintained at 25°C	50/72	114	-
	BL#458 × GD31442◊	elav:GAL4>IRDCP1		6/29	178	<0.0001(****)
	BL#458 × KK105638◊	elav:GAL4>IRDCP1		5/29	244	<0.0001(****)
2◊	BL#458◊	elav:GAL4	Grown and maintained at 29°C	30/40	101	-
	BL#458 × GD31442◊	elav:GAL4>IRDCP1		5/32	110	<0.0001(****)
3	PS#394	UAS:DCP1:eGFP	Grown and maintained at 25°C	22/45	112	-
	BL#458 × PS#394	elav:GAL4>UAS:DCP1:eGFP		23/46	209	0.9657(ns)
4	BL#458	elav:GAL4	Grown and maintained at 25°C	23/42	100	-
	BL#458 × PS#394	elav:GAL4>UAS:DCP1:eGFP		21/46	98	0.7981(ns)
5	BL#458	elav:GAL4	Grown and maintained at 29°C	18/31	75	-
	BL#458 × PS#394	elav:GAL4>UAS:DCP1:eGFP		17/34	184	0.2142(ns)
6◊	BL#458◊	elav:GAL4	Grown at 18°C transferred at 29°C as 1-day adults	24/37	118	-
	PS#394/80ts	UAS:DCP1:eGFP;GAL80ts		22/41	206	0.4599(ns)
	BL#458 × PS#394/80ts◊	elav:GAL4>UAS:DCP1:eGFP;GAL80ts		38/50	116	<0.0001(****)
7	BL#458	elav:GAL4	Grown at 18°C transferred at 29°C as 1-day adults	28/36	359	-
	PS#394/80ts	UAS:DCP1:eGFP;GAL80ts		20/36	334	<0.0001(****)
	BL#458 × PS#394/80ts	elav:GAL4>UAS:DCP1:eGFP;GAL80ts		35/43	392	<0.0001(****)
◊marks data shown in Figure 5
