# Supplementary material for: mRNA decapping is an evolutionarily conserved modulator of neuroendocrine signaling that controls development and ageing
Source: eLife. 2020 May 5;9:e53757. doi: 10.7554/eLife.53757 (PMC7200159; doi:10.7554/eLife.53757)
Supplement: Figure 5—source data 2. [file elife-53757-fig5-data2.xlsx]

## Sheet: 5A - figure supplement 2
	elav>GAL4	elav>IRDCP1 (GD311442)	elav>IRDCP1 (KK105638) Norm. wings	elav>IRDCP1 (KK105638) Def. wings
Relative mRNA levels	1.07042	0.334442	0.255306	0.319713
	0.705653	0.248765	0.152663	0.139508
	1.22393	0.230461	0.18925	0.2353
