# Supplementary material for: mRNA decapping is an evolutionarily conserved modulator of neuroendocrine signaling that controls development and ageing
Source: eLife. 2020 May 5;9:e53757. doi: 10.7554/eLife.53757 (PMC7200159; doi:10.7554/eLife.53757)
Supplement: Supplementary file 3. [file elife-53757-supp3.xlsx]

## Sheet: Sheet1
List of C. elegansstrains used in this study
Strain	Genotype	Information	Reference
N2	N2 (Bristol)	Wild type (wt)	CGC
BRF159	dcap-1(tm3163)IV	Reduction-of-function mutant of dcap-1	Rousakis et al., 2014
BRF234	dcap-2(ok2023)IV	Loss-of-function mutant for dcap-2	Rousakis et al., 2014
BRF345	synEx31[rol-6(su1006)]	Wild type (N2) roller strain	Borbolis et al., 2017
BRF354	dcap-1(tm3163)IV;synEx31[rol-6(su1006)]	dcap-1 mutant roller strain	Borbolis et al., 2017
BRF250	dcap-1(tm3163)IV;synEx293[unc-119p::dcap-1::gfp::3’UTRdcap-1;rol-6(su1006)]	Neuron specific expression of dcap-1 under the control of unc-119 promoter in dcap-1 mutant background	Borbolis et al., 2017
BRF410	dcap-1(tm3163)IV;synEx345[rab-3p::dcap-1::gfp::3’UTRdcap-1;rol-6(su1006)]	Neuron specific expression of dcap-1 under the control of rab-3 promoter in dcap-1 mutant background	This study
BRF411	dcap-1(tm3163)IV;synEx328[ges-1p::dcap-1::gfp::3’UTRdcap-1;rol-6(su1006)]	Gut specific expression of dcap-1 under the control of ges-1 promoter in dcap-1 mutant background	Borbolis et al., 2017
BRF356	dcap-1(tm3163)IV;synEx326[hlh-1p::dcap-1::gfp::3’UTRdcap-1;rol-6(su1006)]	Muscle specific expression of dcap-1 under the control of hlh-1 promoter in dcap-1 mutant background	Borbolis et al., 2017
BRF478	dcap-1(tm3163)IV;synEx364[col-10p::dcap-1::gfp::3’UTRdcap-1;rol-6(su1006)]	Epidermis specific expression of dcap-1 under the control of col-10 promoter in dcap-1 mutant background	Borbolis et al., 2017
BRF582	synEx293[unc-119p::dcap-1::gfp::3’UTRdcap-1;rol-6(su1006)]	Cross of BRF250 with N2 - Neuron specific expression of dcap-1 under the control of unc-119 promoter in wt background	This study
BRF589	synEx345[rab-3p::dcap-1::gfp::3’UTRdcap-1;rol-6(su1006)]	Cross of BRF410 with N2 - Neuron specific expression of dcap-1 under the control of rab-3 promoter in wt background	This study
BRF588	synEx328[ges-1p::dcap-1::gfp::3’UTRdcap-1;rol-6(su1006)]	Cross of BRF411 with N2 - Gut specific expression of dcap-1 under the control of ges-1 promoter in wt background	This study
BRF632	synEx326[hlh-1p::dcap-1::gfp::3’UTRdcap-1;rol-6(su1006)]	Cross of BRF356 with N2 - Muscle specific expression of dcap-1 under the control of hlh-1 promoter in wt background	This study
BRF591	synEx364[col-10p::dcap-1::gfp::3’UTRdcap-1;rol-6(su1006)]	Cross of BRF478 with N2 - Epidermis specific expression of dcap-1 under the control of col-10 promoter in wt	This study
CF1038	daf-16(mu86)I	Loss-of-function mutant of daf-16	CGC
BRF667	daf-16(mu86)I;synEx31[rol-6(su1006)]	Cross of CF1038 with N2 - daf-16 mutant roller strain	This study
BRF666	daf-16(mu86)I;synEx293[unc-119p::dcap-1::gfp::3’UTRdcap-1;rol-6(su1006)]	Cross of BRF582 with CF1038 - Neuron specific expression of dcap-1 under the control of unc-119 promoter in daf-16 mutant background	This study
BRF412	dcap-1(tm3163)IV;daf-16(mu86)I	Double mutant of dcap-1 and daf-16	Borbolis et al., 2017
HT1702	unc-119(ed3)III;wwEx66[ins-7p::gfp;unc-119(+)]	Transcriptional fusion of ins-7 promoter with GFP in wt background	CGC
BRF635	dcap-1(tm3163)IV;unc-119(ed3)III;wwEx66[ins-7p::gfp;unc-119(+)]	Cross of HT1702 with BRF159 - Transcriptional fusion of ins-7 promoter with GFP in dcap-1 mutant background	This study
KR1577	dpy-5(e61)I,unc-13(e450);szDp1X	Loss-of-function mutant of unc-13	CGC
DA509	unc-31(e928)IV	Loss-of-function mutant of unc-31	CGC
BRF763	dpy-5(e61)I,unc-13(e450);szDp1X;unc-119(ed3)III;wwEx66[ins-7p::gfp;unc-119(+)]	Cross of BRF635 with KR1577 - Transcriptional fusion of ins-7 promoter with GFP in unc-13 mutant background	This study
BRF764	dcap-1(tm3163)IV;dpy-5(e61)I,unc-13(e450);szDp1X;unc-119(ed3)III; wwEx66[ins-7p::gfp;unc-119(+)]	Cross of BRF635 with KR1577 - Transcriptional fusion of ins-7 promoter with GFP in dcap-1 and unc-13 double mutant background	This study
BRF765	unc-31(e928)IV;unc-119(ed3)III;wwEx66[ins-7p::gfp;unc-119(+)]	Cross of BRF635 with DA509 - Transcriptional fusion of ins-7 promoter with GFP in unc-31 mutant background	This study
BRF766	dcap-1(tm3163)IV;unc-31(e928)IV;unc-119(ed3)III;wwEx66[ins-7p::gfp;unc-119(+)]	Cross of BRF635 with DA509 - Transcriptional fusion of ins-7 promoter with GFP in dcap-1 and unc-31 double mutant background	This study
RB1388	ins-7(ok1573)IV	Loss-of-function mutation of ins-7	CGC
BRF679	ins-7(ok1573)IV;unc-119(ed3)III;wwEx66[ins-7p::gfp;unc-119(+)]	Cross of BRF635 with RB1388 - Transcriptional fusion of ins-7 promoter with GFP in dcap-1 mutant background	This study
BRF678	dcap-1(tm3163)IV;ins-7(ok1573)IV;unc-119(ed3)III;wwEx66[ins-7p::gfp;unc-119(+)]	Cross of BRF635 with RB1388 - Transcriptional fusion of ins-7 promoter with GFP in dcap-1 and ins-7 double mutant background	This study
CF1407	daf-16(mu86)I;muIs71[gfp::daf-16a;rol-6(su1006)]	Translational fusion of DAF-16a with GFP in daf-16 mutant background	CGC
BRF727	muIs71[gfp::daf-16a;rol-6(su1006)]	Cross of BRF159 with CF1407 - Translational fusion of DAF-16a with GFP in wt background	This study
BRF406	dcap-1(tm3163)IV;muIs71[gfp::daf-16a;rol-6(su1006)]	Cross of BRF159 with CF1407 - Translational fusion of DAF-16a with GFP in dcap-1 mutant background	This study
TU3311	uIs60[unc-119p::yfp;unc-119p::sid-1]	Hypersensitive neuronal RNAi by feeding	CGC
BRF540	uIs60[unc-119p::yfp;unc-119p::sid-1];synEx31[rol-6(su1006)]	TU3311 roller strain	This study
BRF499	uIs60[unc-119p::yfp;unc-119p::sid-1]; synEx345[rab-3p::dcap-1::gfp::3’UTRdcap-1;rol-6(su1006)]	Neuron specific expression of dcap-1 under the control of rab-3 promoter and hypersensitive neuronal RNAi by feeding	This study
BRF788	dcap-2(ok(2023)IV;synEx31[rol-6(su1006)]	dcap-2 mutant roller strain	This study
BRF774	dcap-2(ok2023)IV;synEx293[unc-119p::dcap-1::gfp::3’UTRdcap-1;rol-6(su1006)]	Cross of BRF582 with BRF234 - Neuron specific expression of dcap-1 under the control of unc-119 promoter in dcap-2 mutant background	This study
BRF775	dcap-2(ok2023)IV;synEx328[ges-1p::dcap-1::gfp::3’UTRdcap-1;rol-6(su1006)]	Cross of BRF588 with BRF234 - Gut specific expression of dcap-1 under the control of ges-21 promoter in dcap-2 mutant background	This study
BRF169	synEx176[ges-1p::gfp;rol-6(su1006)]	Transcriptional fusion of ges-1 promoter with GFP in wt background	This study
BRF176	dcap-1(tm3263)IV;synEx176[ges-1p::gfp;rol-6(su1006)]	Cross of BRF169 with BRF159 - Transcriptional fusion of ges-1 promoter with GFP in dcap-1 mutant background	This study
BRF793	dcap-1(tm3263)IV;ins-7(ok1573)IV;synEx478[unc-119p::ins-7;rol-6(su1006)]	Neuron specific expression of ins-7 under the control of unc-119 promoter in dcap-1 and ins-7 double mutant background	This study
BRF792	ins-7(ok1573)IV;synEx478[unc-119p::ins-7;rol-6(su1006)]	Cross of BRF792 with RB1388 - Neuron specific expression of ins-7 under the control of unc-119 promoter in ins-7 mutant background	This study
HT1888	daf-16(mgDf50)I;unc-119(ed3III);lpIs12[daf-16a::rfp;unc-119(+)]	Translational fusion of DAF-16a with RFP in daf-16 mutant background	CGC
BRF784	daf-16(mgDf50)I;unc-119(ed3III);lpIs12[daf-16a::rfp;unc-119(+)]; synEx293[unc-119p::dcap-1::gfp::3’UTRdcap-1;rol-6(su1006)]	Neuron specific expression of dcap-1 under the control of unc-119 promoter and translational fusion of DAF-16a with RFP in daf-16 mutant background	This study
