# Supplementary material for: mRNA decapping is an evolutionarily conserved modulator of neuroendocrine signaling that controls development and ageing
Source: eLife. 2020 May 5;9:e53757. doi: 10.7554/eLife.53757 (PMC7200159; doi:10.7554/eLife.53757)
Supplement: Supplementary file 4. [file elife-53757-supp4.xlsx]

## Sheet: Sheet1
List of D. melanogasterstrains used in this study.
Strain	Information	Reference
BL#458	Neuron specific expression of GAL4 driver	BDSC
BL#30564	Expression of GAL in the posterior compartment of embryonic segments	BDSC
GD31442	Expression of DCP1 double stranded RNA under the control of UAS element	VDRC
KK105638	Expression of DCP1 double stranded RNA under the control of UAS element	VDRC
BL#24749	For transgene integration at chromosome III	BDSC
BL#7108	Expression of temperature sensitive GAL80 (GAL80ts)	BDSC
PS#394	DCP1:egfp transgene overexpression under the control of UAS element	This study
PS#394/80ts	Thermoinducible DCP1:egfp transgene overexpression under the control of UAS element	This study
