# Supplementary material for: mRNA decapping is an evolutionarily conserved modulator of neuroendocrine signaling that controls development and ageing
Source: eLife. 2020 May 5;9:e53757. doi: 10.7554/eLife.53757 (PMC7200159; doi:10.7554/eLife.53757)
Supplement: Supplementary file 5. [file elife-53757-supp5.xlsx]

## Sheet: Sheet1
List of primers used in this study
Primer	Sequence (5’-3’)	Used for
rab-3p/F	GGCTGCAGATCTTCAGATGGGAGCAGTGG	Cloning of rab-3 promoter
rab-3p/R	GGGGATCCCTGAAAATAGGGCTACTGTAGAT
ges-1p/F	ATGGCTGCAGTACCATTTTTCTTCGCG	Cloning of ges-1 promoter
ges-1p/R	AACTGCAGCTGAATTCAAAGATAAGATATG
daf-16/F	GGCTATTTCTCACTGTCTAC	Tracking daf-16(mu86) allele
daf-16/R	CGATTGAGTTCGGGGACTG
ins-7 Del/F	GATGGCTCGTCTCAAACAAAG	Tracking ins-7(ok1573) allele
ins-7 Del/R	AAGTCGTCGGTGCATTCTTC
ins-7i/F	GATCTAGACTAATCAATACGGTAAGTACTC	ins-7 RNAi construct
ins-7i/R	AACTCGAGAGGACAGCACTGTTTTCG
unc-119p/F	GCCCTCGAGGCAATTGTTTTGTGCCAAGCTTCA	Cloning of unc-119p promoter
unc-119p/R	GGCTGCAGATATGCTGTTGTAGCTGAAAATTTTGGG
ins-7/F	CGTCTGCAGTTCTTAACATTTTGCCGAGAAT	Cloning of ins-7conding region and 3' UTR
ins-7/R	CCATCTAGAGTACTATGATAATTCATCCACA
ama-1/RT1	GCTCCAAATGACCGAAATGT	qRT-PCR (C. elegans reference)
ama-1/RT2	GCCCGGAGGAGATTAAACG
ins-7/RT1	TGCAATATTAACTTCAGTATTCGATTCG	qRT-PCR (with ins-7/F)
pre-ins-7/Rev	GTAGAAACAGTATTAAAACCAACTCG	qRT-PCR (with ins-7/F)
ins-6/RT1	GAACTCTGTCTTTACTATCATCTTCG	qRT-PCR
ins-6/RT2	CAATGTCCTTTCCTTCTTGTGGG
ins-1/RT1	TGTACTGGTTTCGTCAAGTTTACAG	qRT-PCR
ins-1/RT2	GCGAGTTGTTGGTGCATAGGA
daf-28/RT1	TCTTTGCCGTACTCGTCCTC	qRT-PCR
daf-28/RT2	GCGATGTCAATTCCTTCTTGTGG
eft-3 RT1	CATATCAACATCGTCGTCATCG	qRT-PCR
eft-3 RT2	AAGATCCCTTACCCATCTCCTG
pre-eft-3/F	CTTGATCTACAAGTGCGGAGGA	qRT-PCR
pre-eft-3/R	CGGGTGAGAAAATCTTTCAAACTA
Rpp20/RT1	GCTAAGCTGTCGCACAAATG	qRT-PCR (D. melanogaster reference)
Rpp20/RT2	GTTCGATCCGTAACCGATGT
dDcp1/RT1	GCGACCTGAAGATCGGTAAAAG	qRT-PCR
dDcp1/RT2	GGATAAGGTACGTGAAGGCCT
burs/RT1	CGCCACGGATAATGATATTACG	qRT-PCR
burs/RT2	CAGACTCCTGGCAGCACAT
rickets/RT1	CGCTGTTTTGACAGCATCA	qRT-PCR
rickets/RT2	CTGCCGCAGTTCGAATTTAT
